Title: CONTINUOUS, NONINVASIVE CARDIAC OUTPUT MONITORING BY ELECTRICAL BIOIMPEDANCE AND TRANSESOPHAGEAL CONTINUOUS-WAVE DOPPLER ULTRASOUND.

Authors: D. R. Spahn, M.D., E. R. Schmid, M.D., M. Tornic, M.D., (\*) R. Jenni, M.D., A. Baetscher M.D.

Affiliation: Division of Cardiovascular Anesthesia, Institute of Anesthesiology, (\*) Division of Cardiology, Department of Internal Medicine, Medical Policlinic, University Hospital, Raemistrasse 100, CH-8091 Zuerich, Switzerland.

**Introduction:** Continuous, noninvasive cardiac output (CO) monitoring has been claimed as an alternative to intermittent invasive CO assessment by standard means. The present study was designed to determine the clinical applicability, accuracy and reliability of CO monitoring by electrical bioimpedance (BIO) and transesophageal continuous-wave Doppler ultrasound (TED) in patients after cardiac surgery as compared to the Fick (F) and thermodilution (TD) methods.

**Methods:** With informed consent of each patient and institutional approval, 111 simultaneous CO measurement sets were carried out early after aorto-coronary bypass surgery (ACBS) in 25 patients (group 1).  $CO_{BIO}$  (NCCOM-3, BoMed),  $CO_{TED}$  (Accucom, Datascope) and  $CO_{TD}$  (Edwards 9520A) were the calculated mean of 5 single CO determinations. Oxygen consumption was measured by indirect calorimetry (MMC, Horizon, Sensor Medics). TED, which measures blood flow velocities in the descending aorta, was calibrated before each measurement period with the aid of its suprasternal continuous-wave Doppler probe (SSD), estimating CO output in the ascending aorta, whereby the value of the built-in nomogram was used as aortic diameter. To test whether TED displayed the CO trend correctly, TED was calibrated by TD in an additional group of 15 patients (group 2) before starting the individual CO measurement series.

**Results:**  $CO_F$  and  $CO_{TD}$  showed an excellent agreement ( $CO_F = 0.13 + 1.01 \cdot CO_{TD}$ ,  $r = 0.96$ ,  $n = 99$ ,  $SEE = 0.43$ ). TD was thus chosen as the reference method.  $CO_{TD}$  was underestimated by BIO (fig A) and overestimated by TED (fig B) in group 1. Both correlations showed a distinct scatter of data.  $CO_F$  and  $CO_{TD}$  displayed the relative CO-changes ( $\Delta CO$ ) correspondingly ( $\Delta CO_F = 0.56\% + 0.95 \cdot \Delta CO_{TD}$ ,  $r = 0.87$ ,  $n = 77$ ,  $SEE = 9.00\%$ ). The correlation between  $\Delta CO_{TD}$  and  $\Delta CO_{BIO}$  as well as  $\Delta CO_{TED}$  showed a considerable scattering of results (fig C,D).

**Discussion:** Agreement of  $CO_F$  and  $CO_{TD}$  as well as of  $\Delta CO_F$  and  $\Delta CO_{TD}$ , confirmed the accuracy of these invasive techniques. In contrast, the results obtained with both continuous, noninvasive CO monitoring techniques question their reliability in the patient population investigated.  $SV_{BIO}$  is proportional to  $ET \cdot L^3 / TFI$ , where  $SV$  = stroke volume,  $ET$  = ejection time,  $TFI$  = thoracic fluid index and  $L$  = length of the truncated cone. After ACBS, the thoracic fluid content is likely to be increased. The correspondingly lowered TFI ( $23.5 \pm 2.6$ ; normal 24-45) thus cannot explain the  $CO_{TD}$  underestimation by BIO. Comparing only sets of CO measurements where  $ET_{BIO}$  was 90-110% of the physiological ET (or less if  $CI < 2.5 l/min \cdot m^2$ ), the correlation of  $CO_{BIO}$  to  $CO_{TD}$  slightly improved ( $CO_{BIO} = 0.05 + 0.69 \cdot CO_{TD}$ ,  $r = 0.84$ ,  $n = 80$ ,  $SEE = 0.66$ ). Finally,

slight underestimation of the L by the Bernstein nomogram (1) could explain the observed, considerable CO underestimation, because L enters the  $CO_{BIO}$  computation in the third power. TED overestimated  $CO_{TD}$  in group 1, mainly because the calibration value ( $CO_{CAL-SSD}$ ) exceeded  $CO_{TD}$  ( $CO_{CAL-SSD} = 1.67 + 0.84 \cdot CO_{TD}$ ,  $r = 0.65$ ,  $n = 79$ ,  $SEE = 1.40$ ). If only  $CO_{CAL-SSD}$  with physiological ET were considered, the correlations of  $CO_{CAL-SSD}$  and  $CO_{TED}$ , respectively, to  $CO_{TD}$  improved ( $CO_{TED} = 0.99 + 0.96 \cdot CO_{TD}$ ,  $r = 0.76$ ,  $n = 49$ ,  $SEE = 1.21$ ). TED failed to display the  $CO_{TD}$  trend correctly. Correlation of  $\Delta CO_{TED}$  to  $\Delta CO_{TD}$  showed a considerable scatter of data (fig D) and individual correlation coefficients ranged from -0.13 to 0.96. We conclude, that neither BIO nor TED precisely measure CO nor display  $\Delta CO$  reliably and, thus, repeated CO determination by TD remains the method of choice for accurate hemodynamic assessment in adult patients following cardiac surgery.

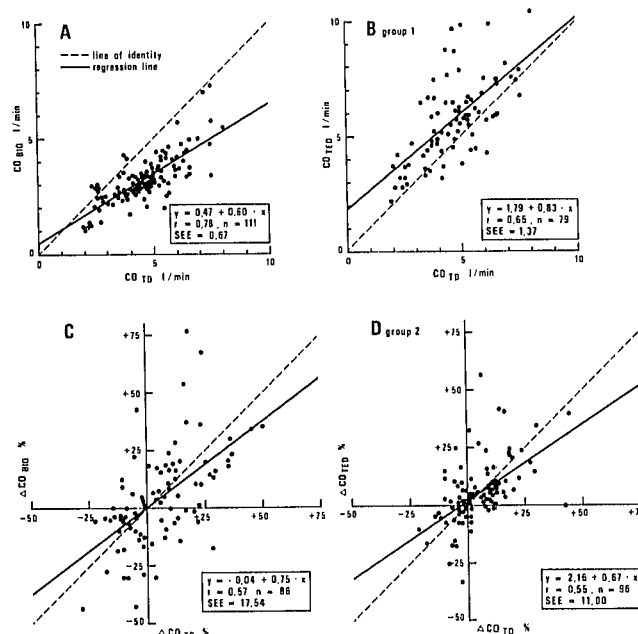

**References:** (1) Bernstein DP: A new stroke volume equation for thoracic electrical bioimpedance: Theory and rationale. Crit Care Med 14:904-909, 1986
